# Supplementary material for: A banana-shaped dinuclear complex with a tris(benzene-o-dithiolato) ligand
Source: Royal Society of Chemistry journal article supplement (doi:10.1039/b926939h), 2010-01-01
Supplement: b926939h.pdf [file b926939h.pdf]

**A banana-shaped dinuclear complex with a tris(benzene-*o*-dithiolato) ligand****Florian Hupka and F. Ekkehardt Hahn****Supporting Information**

Single crystals of (Me<sub>3</sub>PhN)<sub>4</sub>[Ti<sub>2</sub>(1)<sub>2</sub>]·2DMSO·6DMF suitable for an X-ray diffraction analysis were obtained by slow diffusion of diethyl ether into a solution of (Me<sub>3</sub>PhN)<sub>4</sub>[Ti<sub>2</sub>(1)<sub>2</sub>] in MeOH/DMF/DMSO (10:1:1, v:v:v) at ambient temperature. X-ray diffraction data were collected at -120(1) °C with a Bruker AXS APEX diffractometer equipped with a rotating Cu anode (CuK<sub>α</sub> radiation, λ = 1.54178 Å).<sup>[1]</sup> An empirical absorption correction was applied to the raw data (0.74 ≤ T ≤ 0.88). The structure solution was found with SHELXS<sup>[2]</sup> and the refinement was carried out with SHELXL<sup>[3]</sup> using anisotropic thermal parameters for all non-hydrogen atoms, with the exception of atoms O11, N19, C98-C100 belonging to a disordered DMF molecule, which were refined with isotropic thermal parameters. Hydrogen atoms were added to the structure models on calculated positions and were refined as riding atoms (with the exception of hydrogen atoms belonging to the disordered DMF molecule). Additional crystal, data collection and refinement details are summarized in Table S1.

Table S1. Crystallographic Data for (Me<sub>3</sub>PhN)<sub>4</sub>[Ti<sub>2</sub>(1)<sub>2</sub>]·2DMSO·6DMF

| parameter                               |                                                                                                   |
|-----------------------------------------|---------------------------------------------------------------------------------------------------|
| chem. formula                           | C <sub>142</sub> H <sub>164</sub> N <sub>28</sub> O <sub>14</sub> S <sub>14</sub> Ti <sub>2</sub> |
| cryst. size, mm                         | 0.10 x 0.075 x 0.04                                                                               |
| color of crystal                        | red                                                                                               |
| <i>F</i> w, amu                         | 3031.65                                                                                           |
| space group                             | <i>P</i> $\bar{1}$ (no. 2)                                                                        |
| <i>a</i> , Å                            | 14.6767(10)                                                                                       |
| <i>b</i> , Å                            | 21.0095(12)                                                                                       |
| <i>c</i> , Å                            | 25.8753(14)                                                                                       |
| α, deg                                  | 84.555(4)                                                                                         |
| β, deg                                  | 78.851(4)                                                                                         |
| γ, deg                                  | 87.166(4)                                                                                         |
| <i>V</i> , Å <sup>3</sup>               | 7788.8(8)                                                                                         |
| <i>Z</i>                                | 2                                                                                                 |
| radiation, λ, Å                         | Cu Kα, 1.54178                                                                                    |
| <i>T</i> , K                            | 153(1)                                                                                            |
| ρ calcd, g cm <sup>-3</sup>             | 1.293                                                                                             |
| refl. collected/2θ <sub>max</sub>       | 45721/144.8                                                                                       |
| unique reflns, <i>R</i> <sub>int</sub>  | 26396, 0.0687                                                                                     |
| refl. obs. ( <i>I</i> > 2σ( <i>I</i> )) | 16405                                                                                             |
| no. of params/restr                     | 1802/0                                                                                            |
| μ, mm <sup>-1</sup>                     | 3.167                                                                                             |
| <i>R</i> 1 ( <i>I</i> > 2σ( <i>I</i> )) | 0.0900                                                                                            |
| <i>wR</i> 2 (all data)                  | 0.2586                                                                                            |
| GOF                                     | 0.997                                                                                             |
| resid density, e Å <sup>-3</sup>        | +1.18/-1.25                                                                                       |

1 SMART, Bruker AXS, 2000.

2 SHELXS-97, G. M. Sheldrick, *Acta Crystallogr.* **1990**, *A46*, 467–473.3 SHELXL-97, G. M. Sheldrick, *Acta Crystallogr.* **2008**, *A64*, 112–122.
